# Supplementary material for: Microwave Assisted Suzuki-Miyaura and Ullmann Type Homocoupling Reactions of 2- and 3-Halopyridines Using a Pd(OAc)2/Benzimidazolium Salt and Base Catalyst System
Source: Molecules. 2013 Mar 25;18(4):3712–24. doi: 10.3390/molecules18043712 (PMC6269664; doi:10.3390/molecules18043712)

# Supporting Materials

Figure S1.  $^1\text{H}$ -NMR spectrum of compound 1.

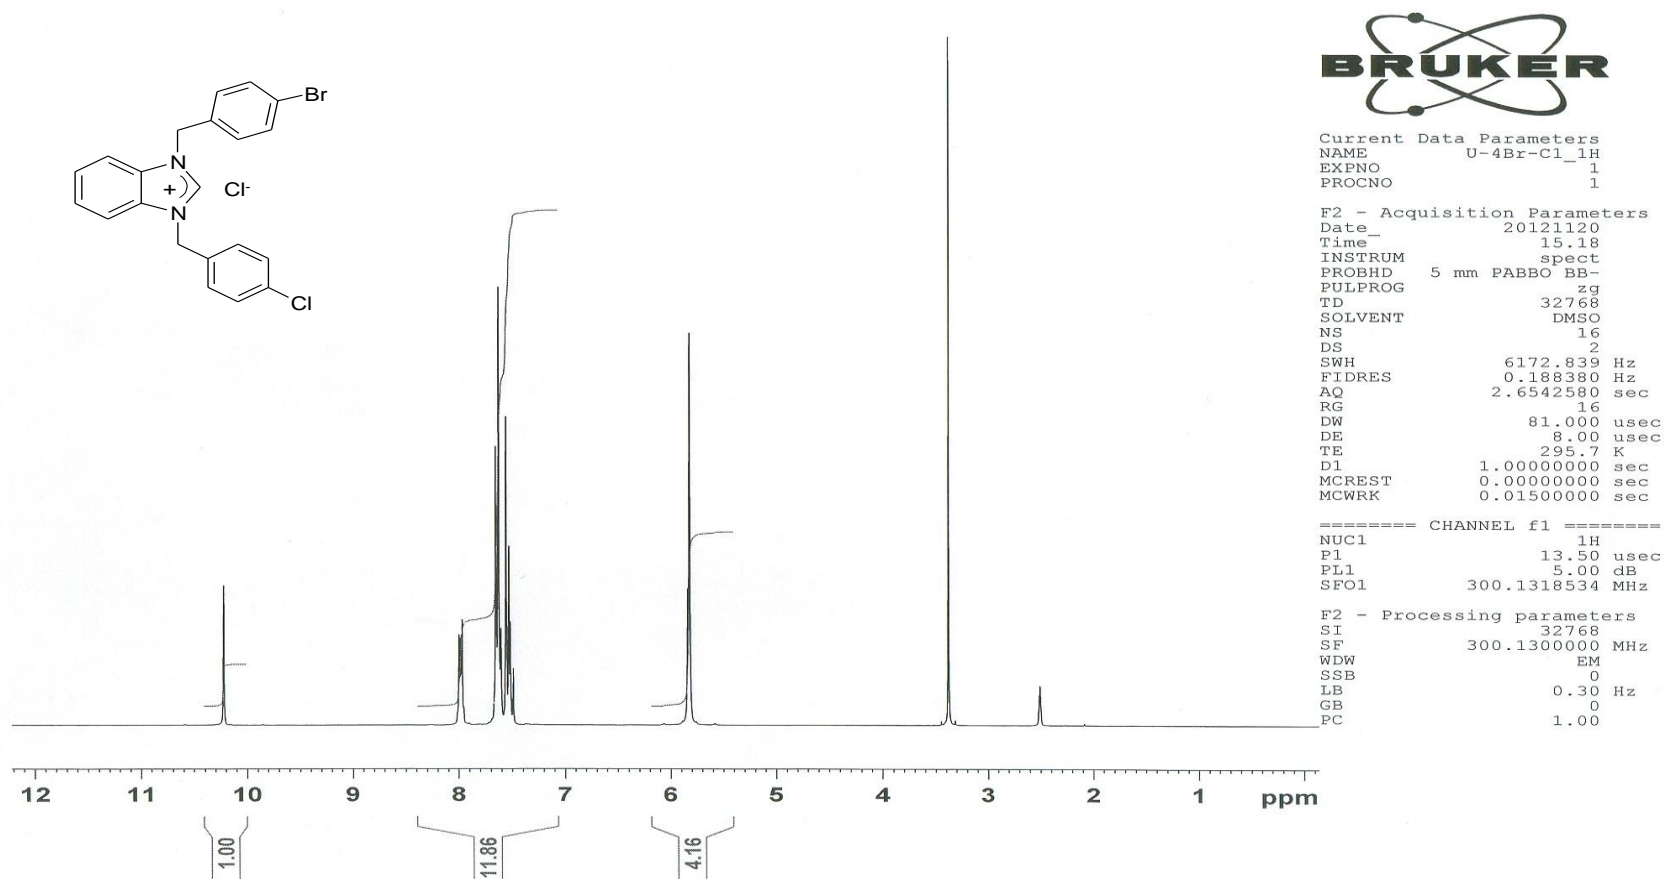

Figure S2.  $^{13}\text{C}$ -NMR spectrum of compound 1.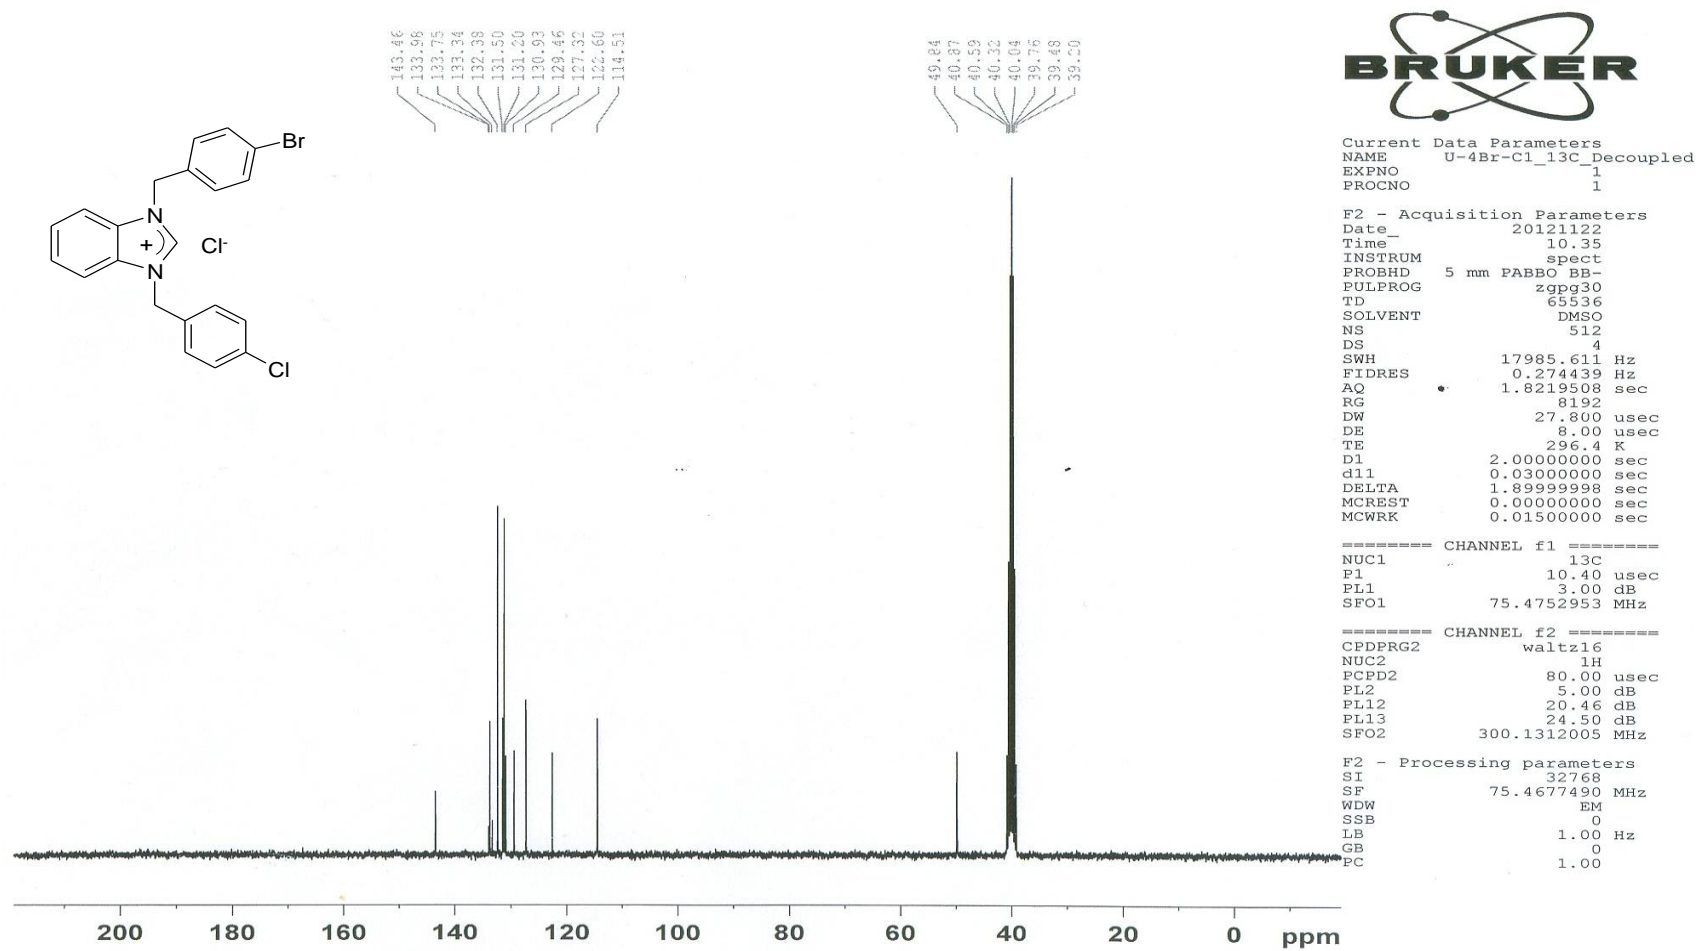

Figure S3.  $^1\text{H}$ -NMR spectrum of compound 2.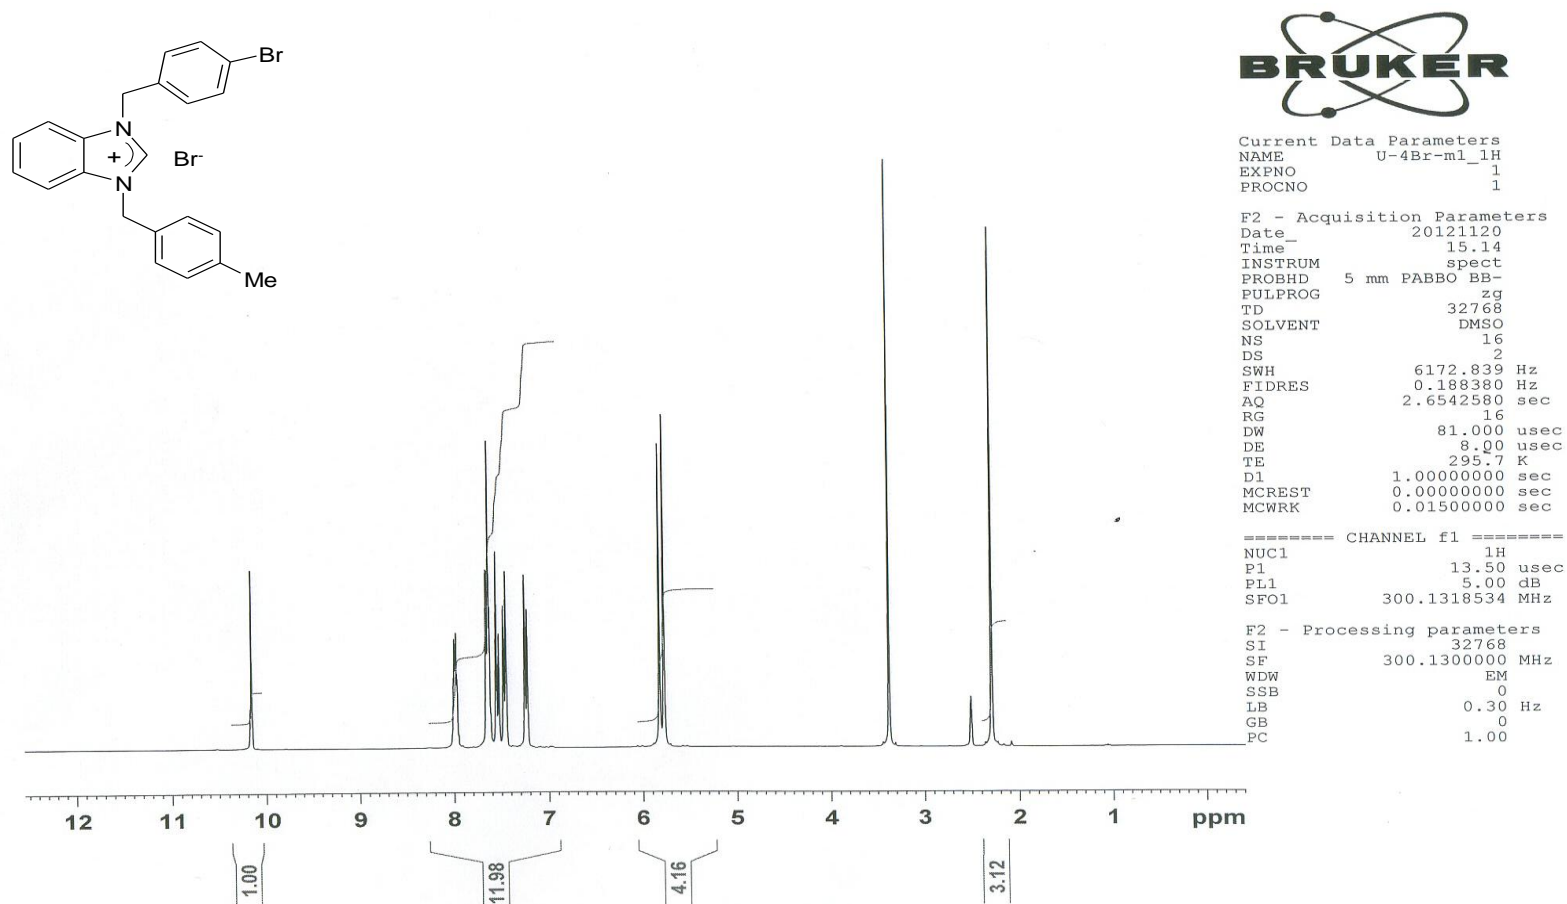

Figure S4.  $^{13}\text{C}$ -NMR spectrum of compound 2.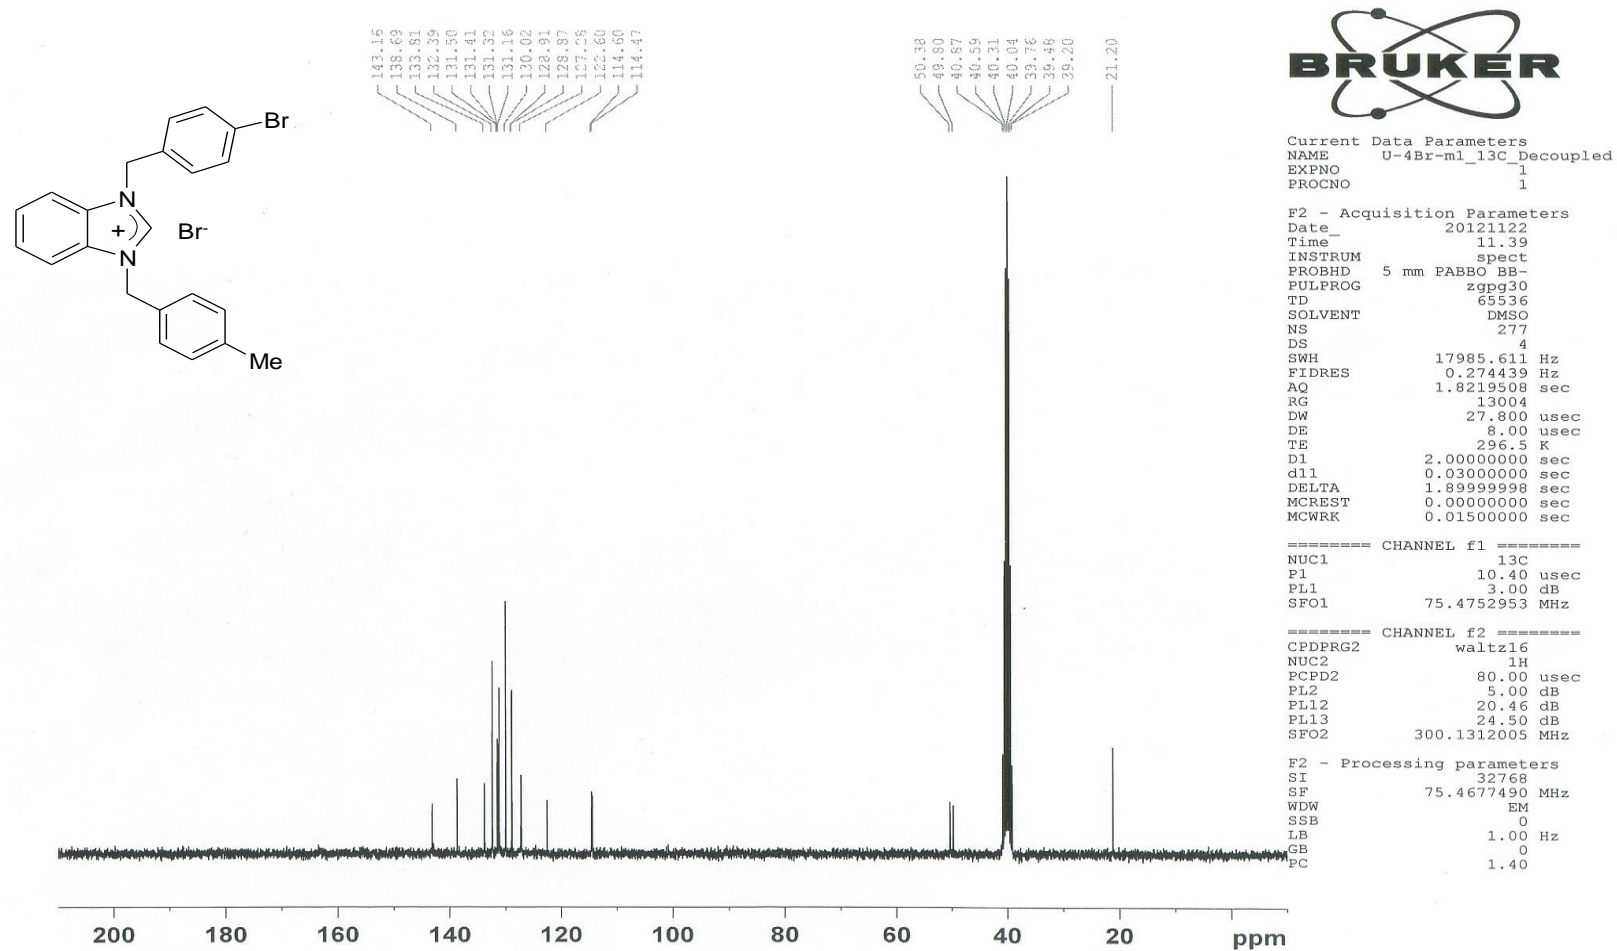

Figure S5.  $^1\text{H}$ -NMR spectrum of compound 3.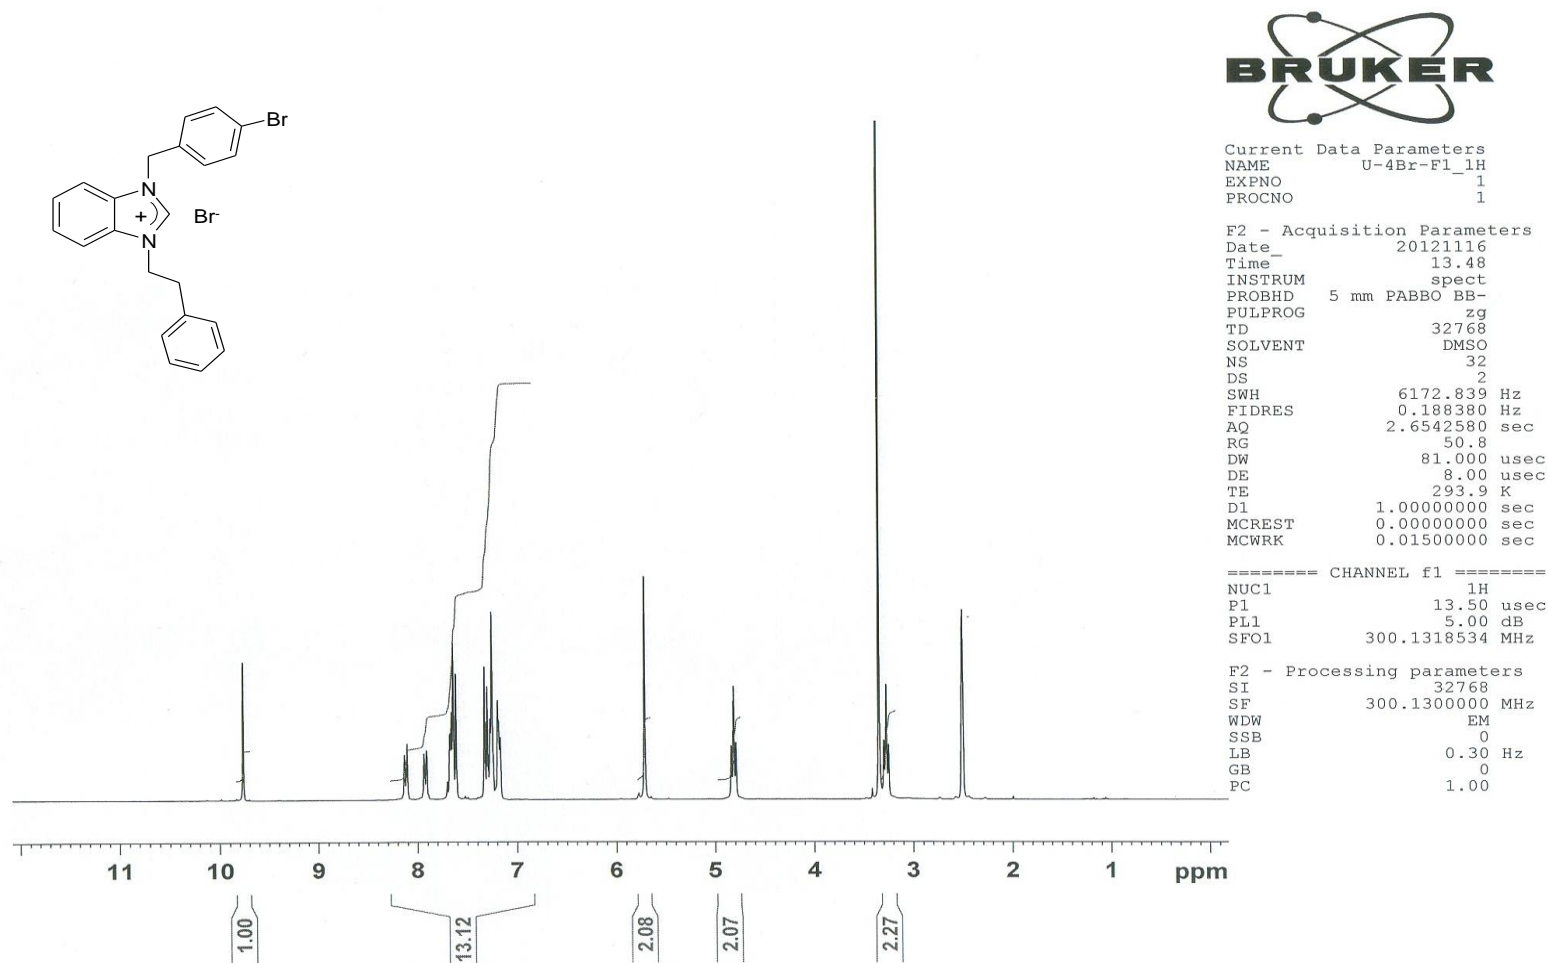

Figure S6.  $^{13}\text{C}$ -NMR spectrum of compound 3.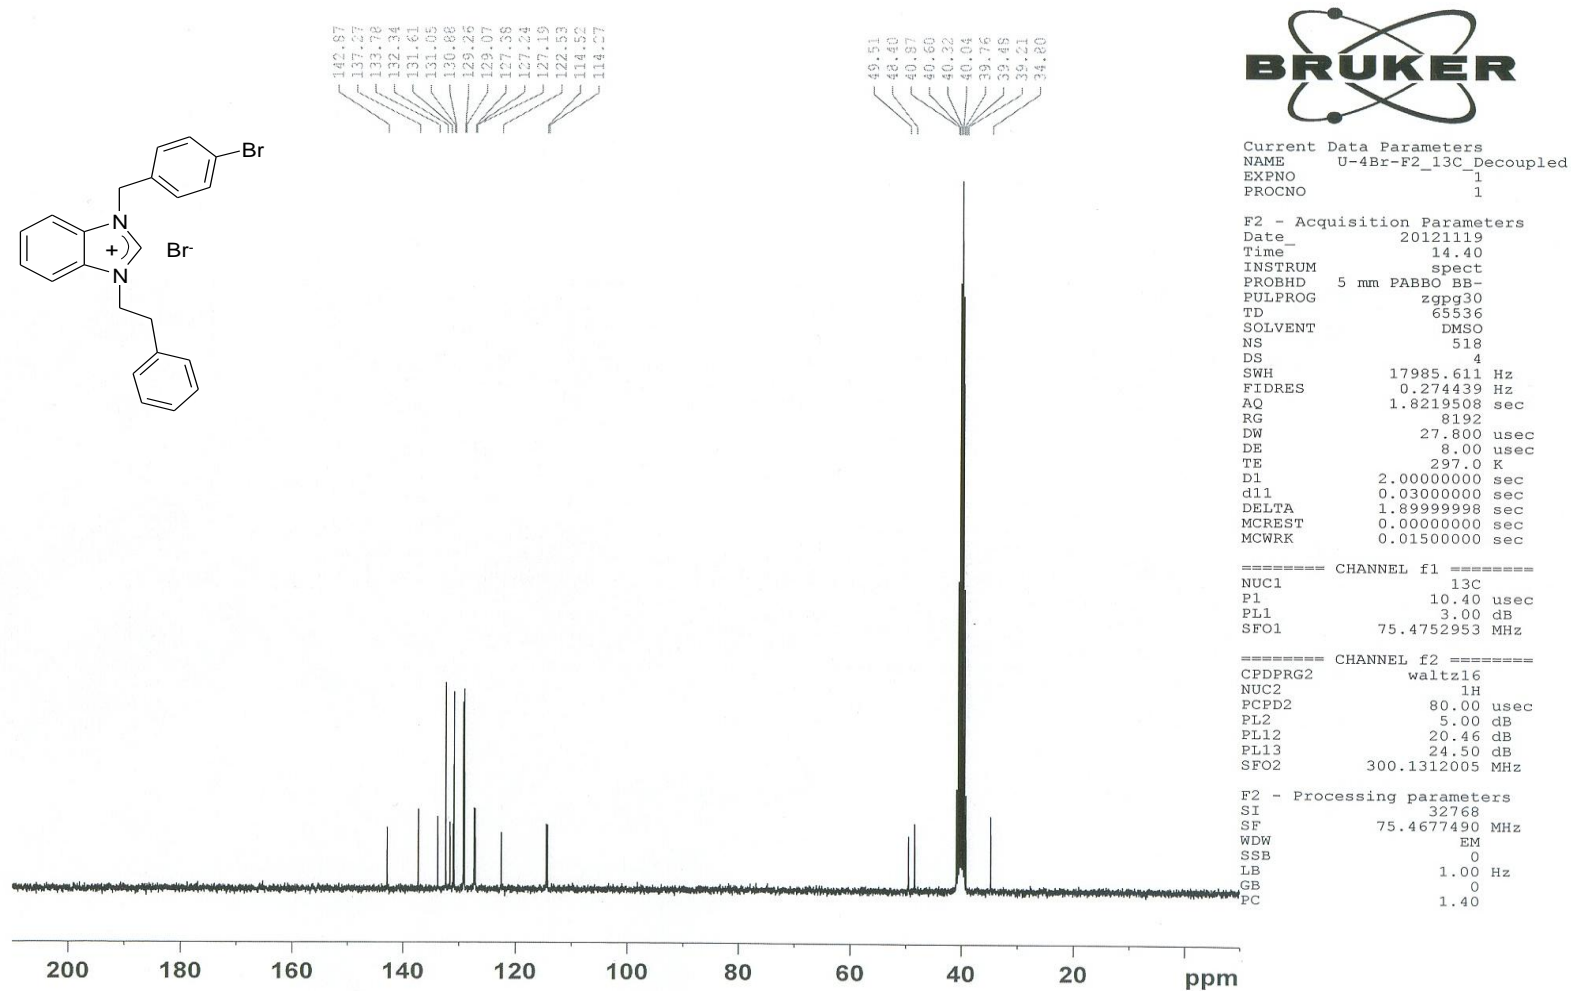

Figure S7.  $^1\text{H}$ -NMR spectrum of compound 4.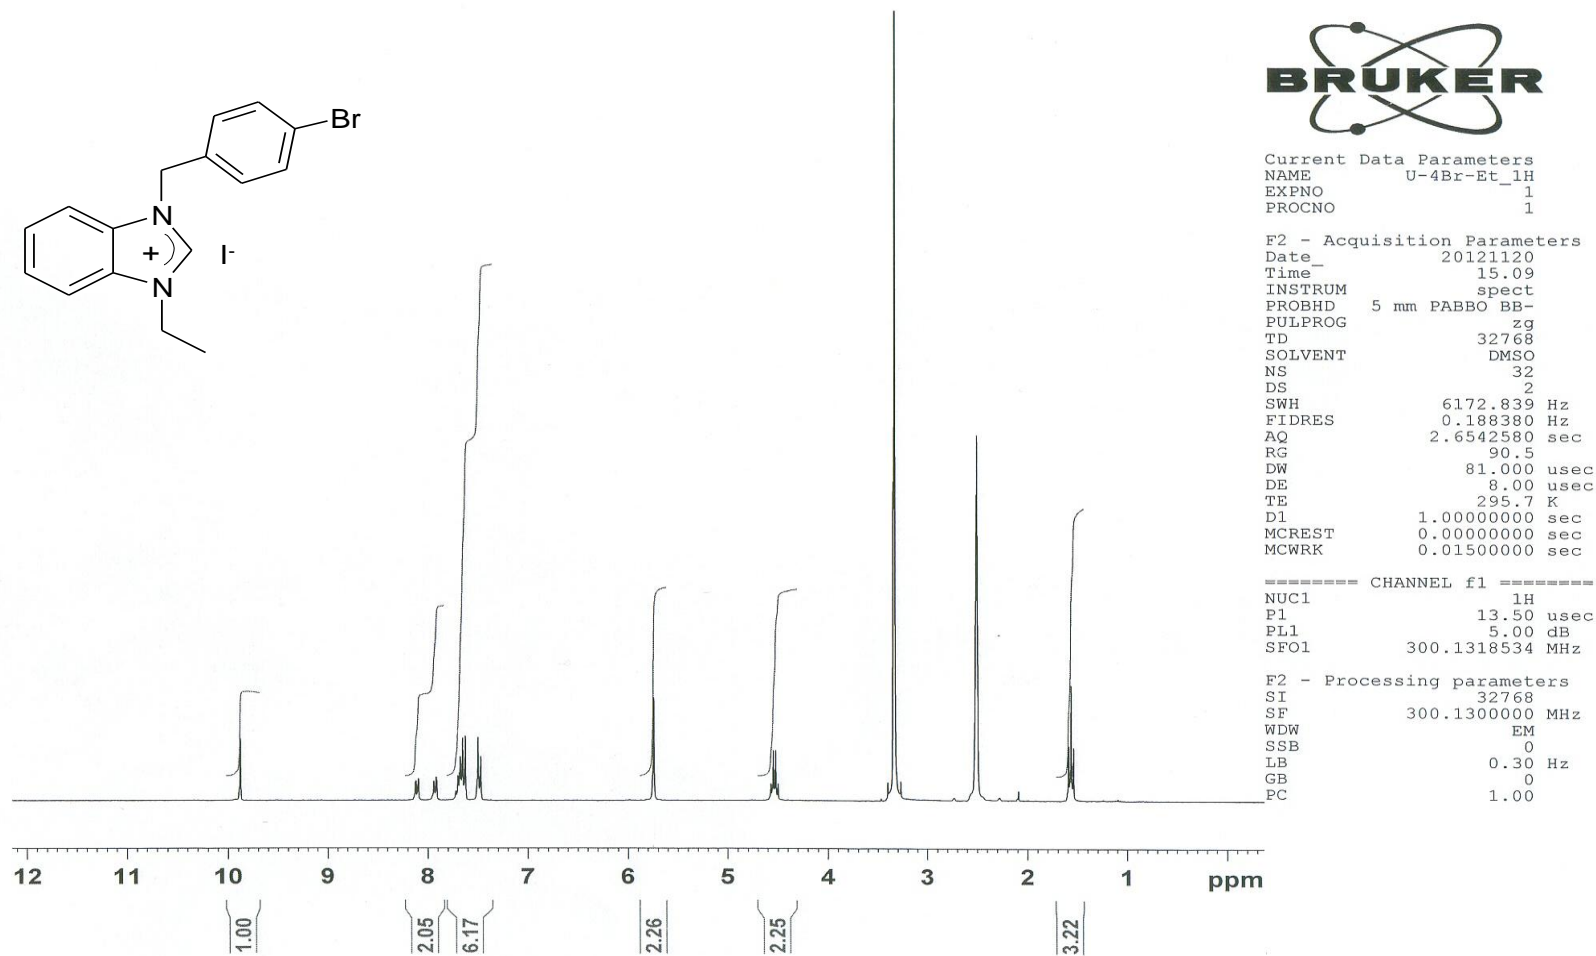

Figure S8.  $^{13}\text{C}$ -NMR spectrum of compound 4.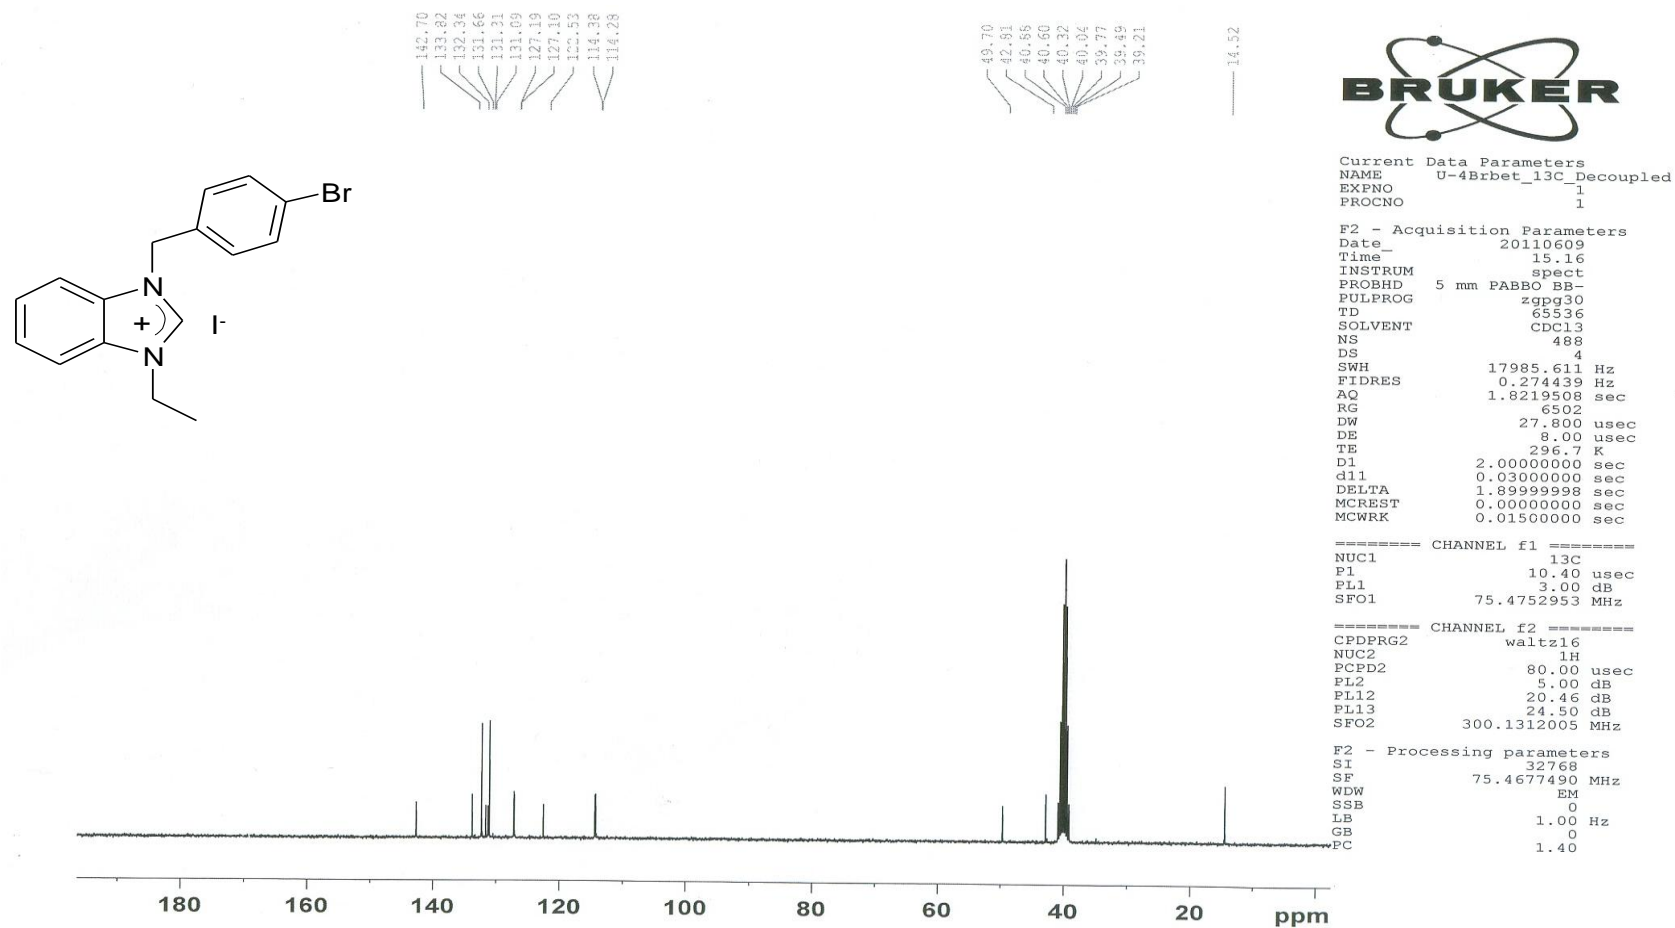

Supplement: Supplementary file 1 [file molecules-18-03712-s001.pdf]
